# Supplementary material for: Required elements for an educational programme for lay exercise instructors in charge of community-based exercise targeting young adults with schizophrenia spectrum disorders – A stakeholder focus group study
Source: Springer Nature journal article supplement (doi:10.1186/s12888-024-05648-9), 2024-03-26
Supplement: MOESM2 [file 26898372]

***Required elements for an educational programme for lay exercise instructors in charge of community-based exercise targeting young adults with schizophrenia spectrum disorders – A stakeholder focus group study***

Martin Færch Andersen<sup>1,2</sup>, Kickan Roed<sup>1</sup>, Victor Sørensen<sup>1</sup>, Allan Riis<sup>2,3</sup>, Bolette Skjødt Rafn<sup>1,4</sup>, Bjørn Hylsebeck Ebdrup<sup>5,6</sup>, Julie Midtgaard<sup>1,6</sup>

\*Correspondence: Martin Færch Andersen, [mfan@ucn.dk](mailto:mfan@ucn.dk)

*1 Centre for Applied Research in Mental Health Care (CARMEN), Mental Health Centre Glostrup, University of Copenhagen, Copenhagen, Denmark*

*2 Department of Physiotherapy, University College of Northern Denmark, Aalborg, Denmark*

**Appendix 2** Overview of the educational programme with headlines on the education content (instructor manual and one-day educational course)

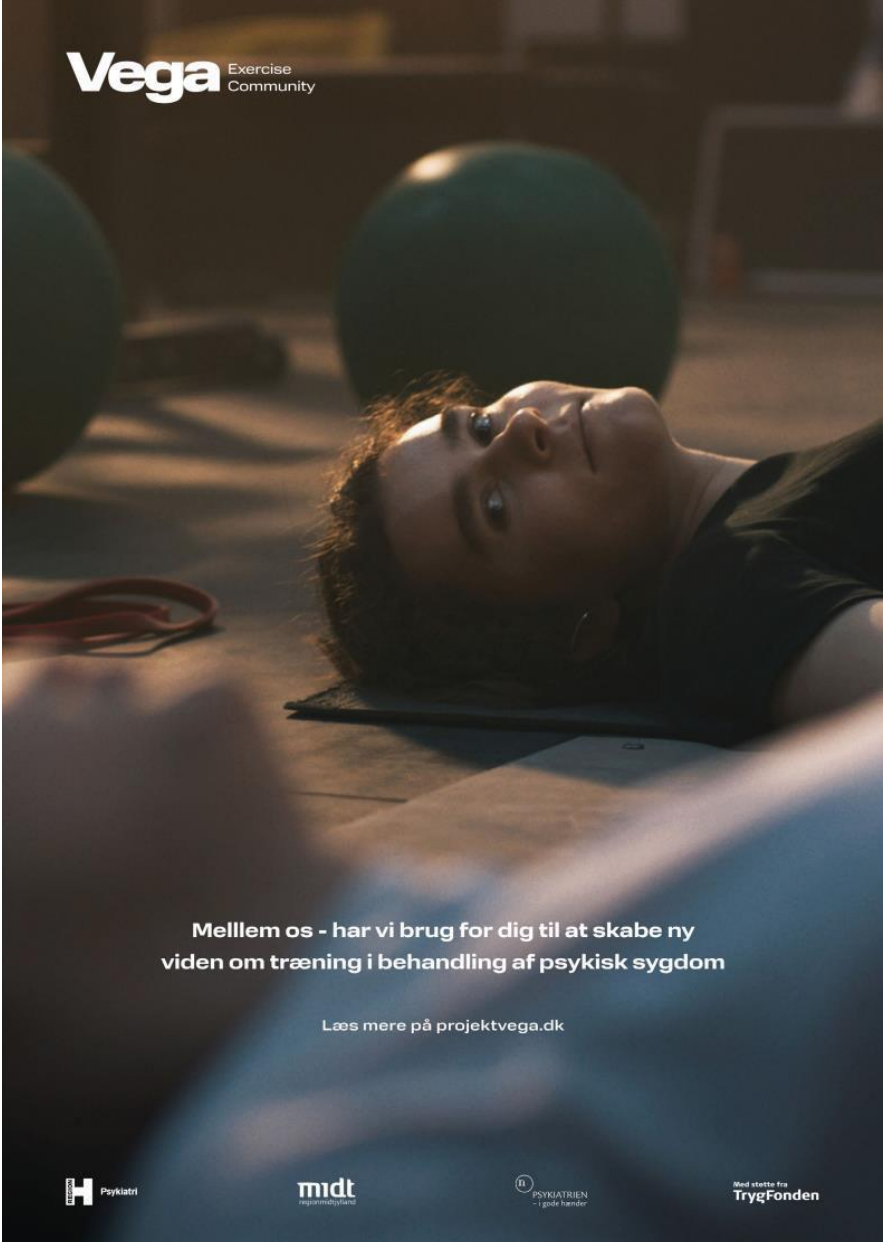

**Vega** Exercise Community

Mellem os - har vi brug for dig til at skabe ny viden om træning i behandling af psykisk sygdom

Læs mere på [projektvega.dk](http://projektvega.dk)

 Psykiatri

 midt  
rehabilitering

 PSYKIATRIEN  
- i gode hænder

Med støtte fra TrykFonden

|                                                          |           |
|----------------------------------------------------------|-----------|
| <b>Introduction .....</b>                                | <b>3</b>  |
| Project aim .....                                        | 3         |
| <b>Mental health and mental illness .....</b>            | <b>4</b>  |
| <b>Schizophrenia and other psychotic disorders .....</b> | <b>4</b>  |
| Symptoms .....                                           | 5         |
| Treatment .....                                          | 5         |
| Living with the illness .....                            | 6         |
| <b>Myths and misunderstandings .....</b>                 | <b>6</b>  |
| Mental illness in everyday language .....                | 7         |
| <b>Being a Vega exercise instructor .....</b>            | <b>7</b>  |
| Recovery .....                                           | 8         |
| Special attention .....                                  | 10        |
| In case of adverse events.....                           | 11        |
| <b>Vega exercise protocol .....</b>                      | <b>13</b> |
| General structure .....                                  | 13        |
| Adjusting the Vega exercise .....                        | 13        |
| An exercise session (example) .....                      | 14        |
| <b>Other working tasks in Vega .....</b>                 | <b>16</b> |
| Exercise self-efficacy meeting .....                     | 16        |
| Extended support meeting.....                            | 18        |
| Administrative registration .....                        | 18        |



|               |                                                                                 |
|---------------|---------------------------------------------------------------------------------|
| 9.00 – 9.30   | Who are we and what is Vega Exercise Community?                                 |
| 9.30 – 10.10  | What are schizophrenia and psychotic disorders<br>w/ Professor and psychiatrist |
| 10.10 – 10.50 | Why is exercise relevant<br>w/ Physiotherapist and PhD student                  |
| 10.50 – 11.00 | Break                                                                           |
| 11.00 – 11.40 | How is the illness treated<br>w/ Psychiatric nurse and<br>teamleader            |
| 11.40 – 12.20 | What is Recovery?<br>w/ Psychiatric nurse and PhD student                       |
| 12.20 – 12.30 | Living with schizophrenia<br>Patient case (video)                               |



|               |                                                                                                     |
|---------------|-----------------------------------------------------------------------------------------------------|
| 12.30-13.15   | Lunch                                                                                               |
| 13.15 – 14.00 | Vega Exercise Community<br>(the exercise protocol)                                                  |
| 14.00 – 14.45 | Practical testing of the exercise protocol<br>w/ Physiotherapist and skilled exercise<br>instructor |
| 14.45 – 15.00 | break                                                                                               |
| 15.00 – 15.45 | Administrative tasks in Vega<br>(Holdsport.dk)                                                      |
| 15.45 – 16.00 | Q&A and evaluation                                                                                  |
